# Supplementary material for: Genome-Wide Association Study of Early Vigour-Related Traits for a Rice (Oryza sativa L.) japonica Diversity Set Grown in Aerobic Conditions
Source: MDPI journal article supplement (doi:10.3390/biology13040261), 2024-04-15
Supplement: s1 [file s1]

## Supplementary material

Table S1 The correlation matrix between mesocotyl length (ML), early vigour score (EVS), plant height (PH), days to emergence (DTE), biomass per plant (Biomass PP), biomass per m<sup>-2</sup> and light interception (LI) in two glasshouse experiments (GH18 and GH21) and three field experiments (FIELD19, FIELD20 and FIELD22)

|                                    | ML<br>GH18 | PH<br>GH18 | DTE<br>GH18 | Biomass PP<br>GH18 | PH<br>GH21 | DTE<br>GH21 | EVS<br>FIELD19 | LI<br>FIELD20 | PH<br>FIELD20 | DTE<br>FIELD20 | Biomass m <sup>-2</sup><br>FIELD20 | EVS<br>FIELD20 |
|------------------------------------|------------|------------|-------------|--------------------|------------|-------------|----------------|---------------|---------------|----------------|------------------------------------|----------------|
| PH GH18                            | 0.68**     |            |             |                    |            |             |                |               |               |                |                                    |                |
| DTE GH18                           | -0.36**    | -0.53**    |             |                    |            |             |                |               |               |                |                                    |                |
| Biomass PP<br>GH18                 | 0.59**     | 0.90**     | -0.50**     |                    |            |             |                |               |               |                |                                    |                |
| PH GH21                            | 0.33**     | 0.42**     | -0.16**     | 0.34**             |            |             |                |               |               |                |                                    |                |
| DTE GH21                           | -0.22**    | -0.15*     | 0.12*       | -0.11ns            | -0.24**    |             |                |               |               |                |                                    |                |
| EVS FIELD19                        | -0.35**    | -0.44**    | 0.25**      | -0.42**            | -0.44**    | 0.14*       |                |               |               |                |                                    |                |
| LI FIELD20                         | 0.33**     | 0.44**     | -0.22**     | 0.30**             | 0.37**     | -0.12ns     | -0.43**        |               |               |                |                                    |                |
| PH FIELD20                         | 0.38**     | 0.52**     | -0.24**     | 0.38**             | 0.48**     | -0.10ns     | -0.44**        | 0.64**        |               |                |                                    |                |
| DTE FIELD20                        | -0.34**    | -0.37**    | 0.12*       | -0.29**            | -0.27**    | 0.20**      | 0.28**         | -0.44**       | -0.29**       |                |                                    |                |
| Biomass m <sup>-2</sup><br>FIELD20 | 0.31**     | 0.40**     | -0.22**     | 0.33**             | 0.24**     | -0.03ns     | -0.27**        | 0.53**        | 0.46**        | -0.36**        |                                    |                |
| EVS FIELD20                        | -0.37**    | -0.47**    | 0.24**      | -0.37**            | -0.37**    | 0.13*       | 0.45**         | -0.66**       | -0.72**       | 0.51**         | -0.57**                            |                |
| EVS FIELD22                        | -0.38**    | -0.52**    | 0.31**      | -0.46**            | -0.49**    | 0.09ns      | 0.45**         | -0.53**       | -0.63**       | 0.25*          | -0.40**                            | 0.54**         |

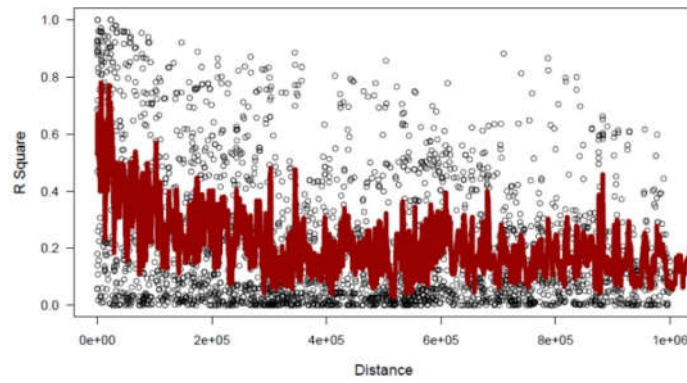

Figure S1 Linkage disequilibrium (R square) decay of marker-pairs over all chromosomes for the population
